# Supplementary material for: T cell membrane cloaking tumor microenvironment-responsive nanoparticles with a smart “membrane escape mechanism” for enhanced immune-chemotherapy of melanoma
Source: Royal Society of Chemistry journal article supplement (doi:10.1039/d1bm00331c), 2021-01-01
Supplement: d1bm00331c12.pdf [file d1bm00331c12.pdf]

## T cell membrane cloaking tumor microenvironment-responsive nanoparticle with smart “membrane escape mechanism” for enhanced immune-chemotherapy of melanoma

Xiaofang Li<sup>1#</sup>, Wen Zhang<sup>1#</sup>, Jing Lin<sup>1#</sup>, Hao Wu<sup>1</sup>, Yucen Yao<sup>1</sup>, Jiayi Zhang<sup>1</sup>, Chunrong Yang<sup>1\*</sup>

<sup>1</sup>College Pharmacy, Jiamusi University, 258 Xuefu Street, Jiamusi, Heilongjiang 154007, China

Xiaofang Li<sup>1#</sup>, Wen Zhang<sup>1#</sup>, Jing Lin<sup>1#</sup> contribute equal to this work.

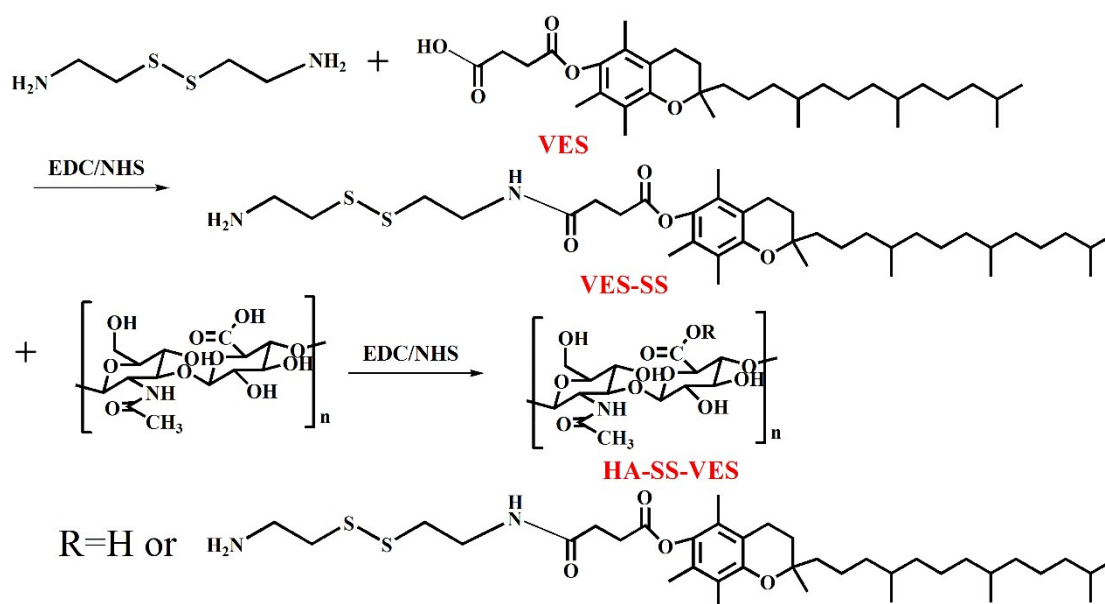

Fig.S1: synthesis route of HA-SS-VES.

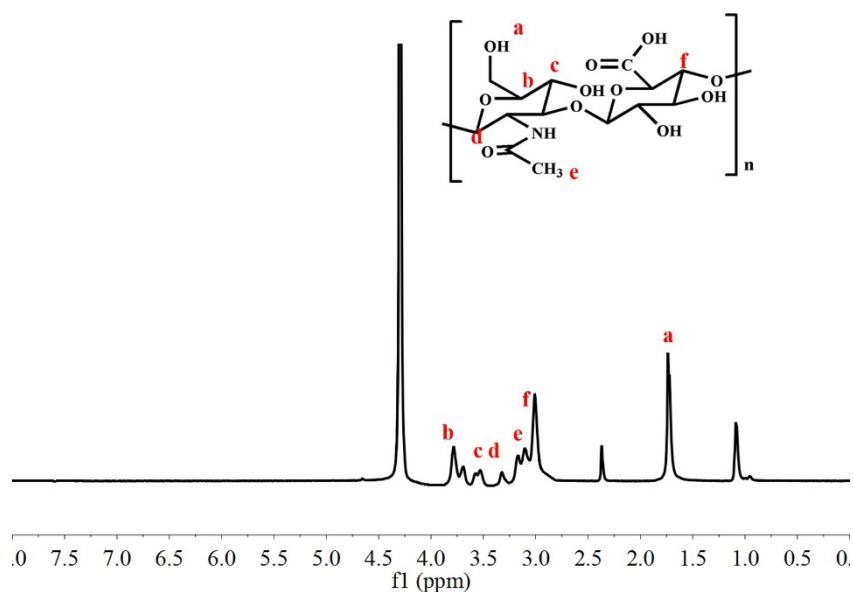

Fig.S2: <sup>1</sup>H-NMR spectrum of HA.

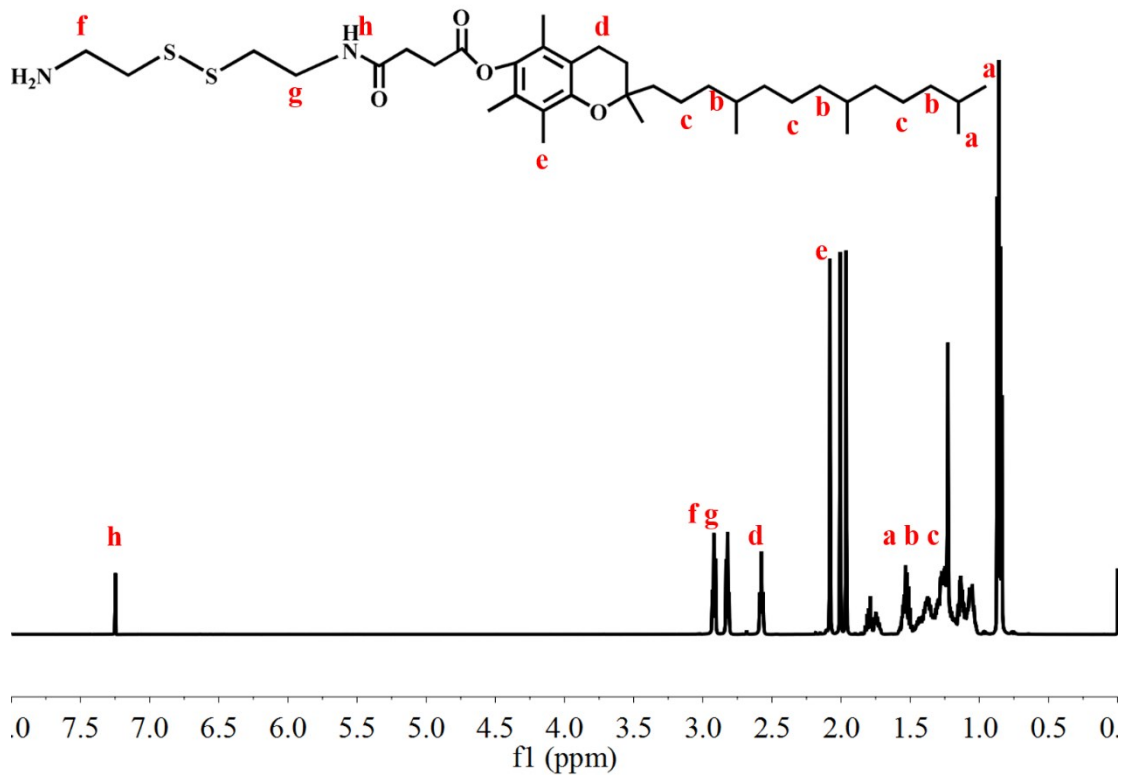

Fig.S3: <sup>1</sup>H-NMR spectrum of SS-VES.

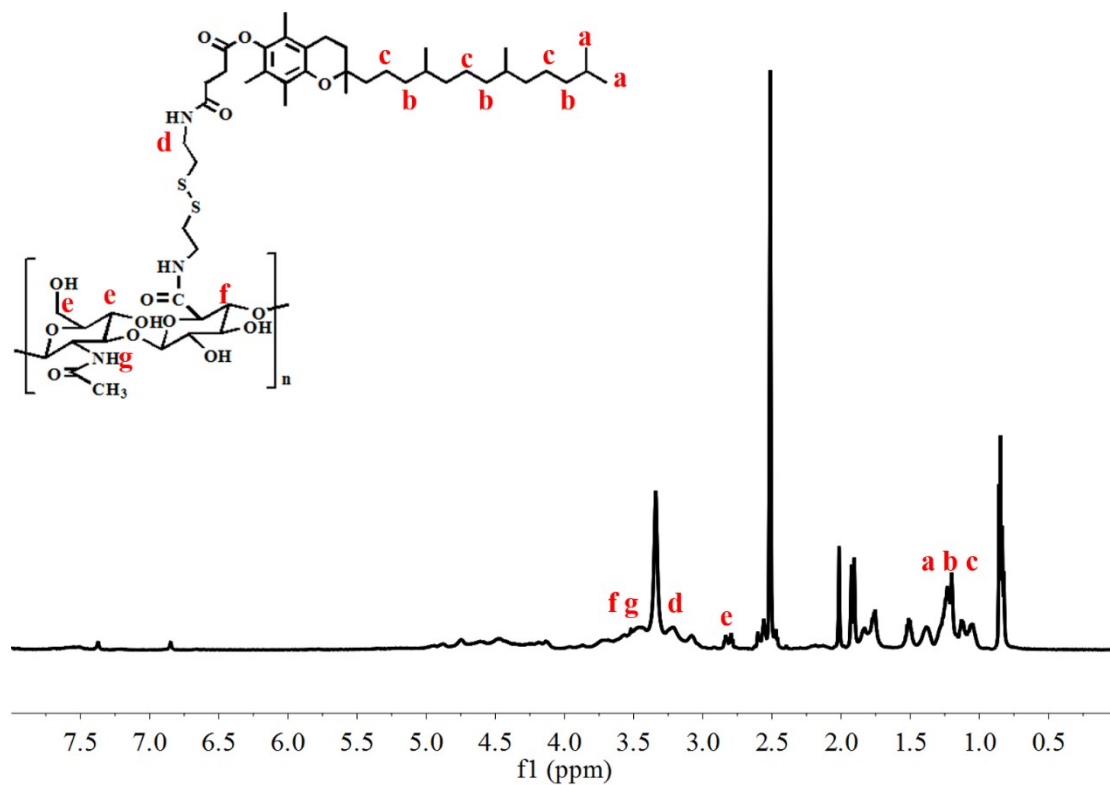

Fig.S4: <sup>1</sup>H-NMR spectrum of HA-SS-VES.

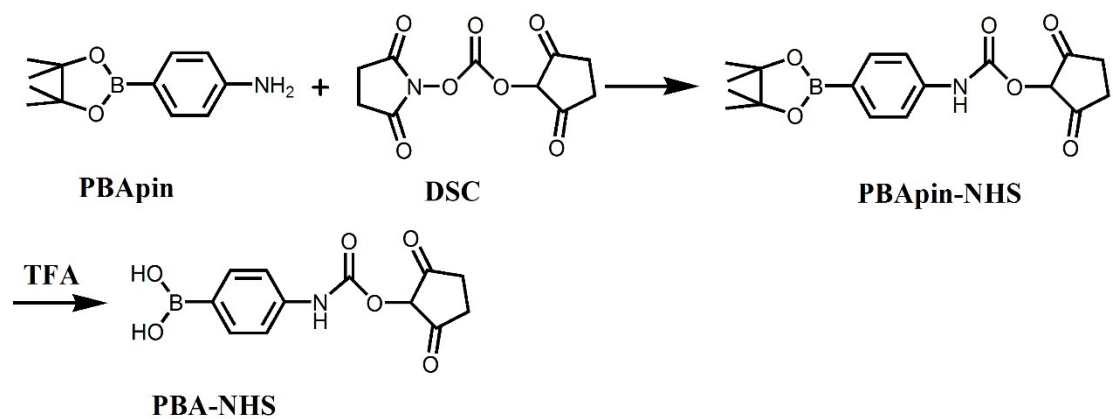

**Fig.S5:** synthesis route of PBA-NHS.

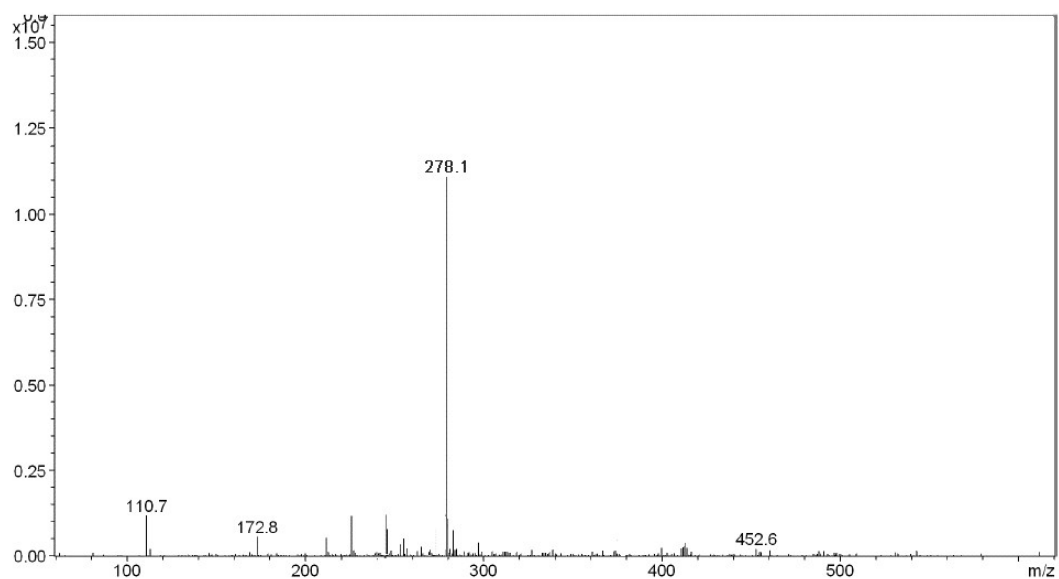

**Fig.S6:** mass spectrometry of PBA-NHS.

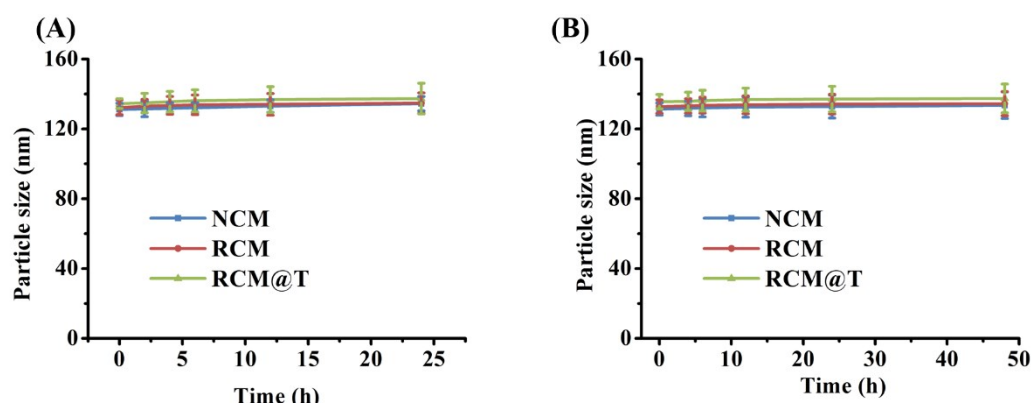

**Fig.S7:** serum stability (A) and storage stability (B) of different formulations.

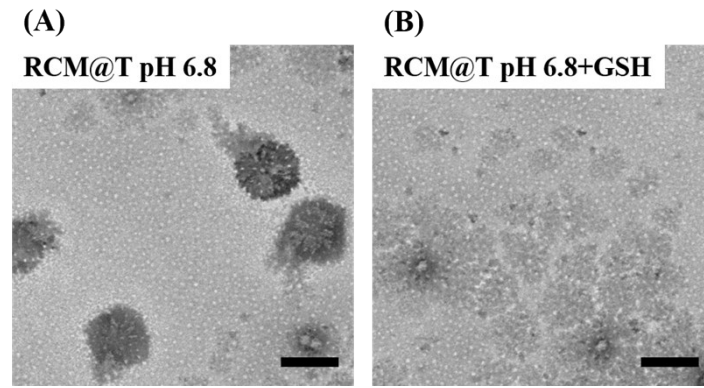

Fig.S8: TEM image of RCM@T in pH 6.8 and pH 6.8+GSH. Scale bars represented 100 nm.

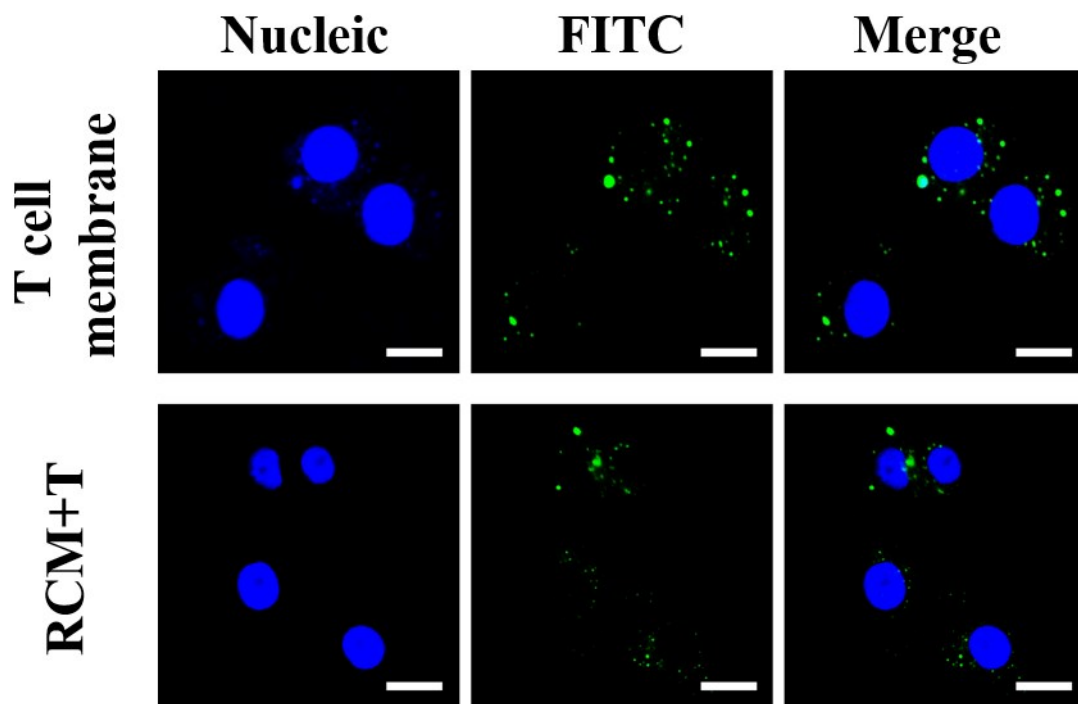

Fig.S9: interaction between T cell membrane and B16 cell line. Scale bars represented 20 μm.

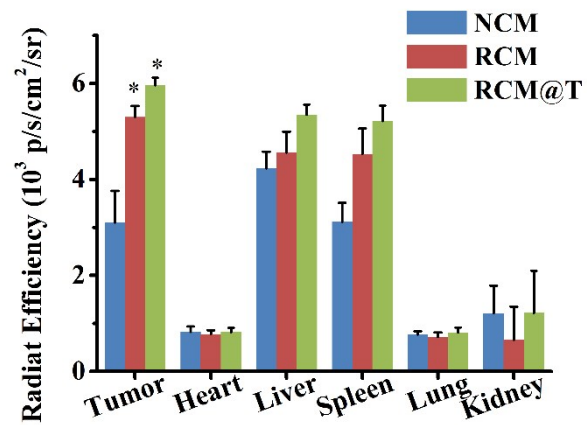

Fig.S10: quantitative analysis of relative organ and tumor accumulation of different formulations.
