# Supplementary figures and images for: T cell membrane cloaking tumor microenvironment-responsive nanoparticles with a smart “membrane escape mechanism” for enhanced immune-chemotherapy of melanoma
Source: Royal Society of Chemistry journal article supplement (doi:10.1039/d1bm00331c), 2021-01-01

**(A)**

**RCM@T pH 6.8**

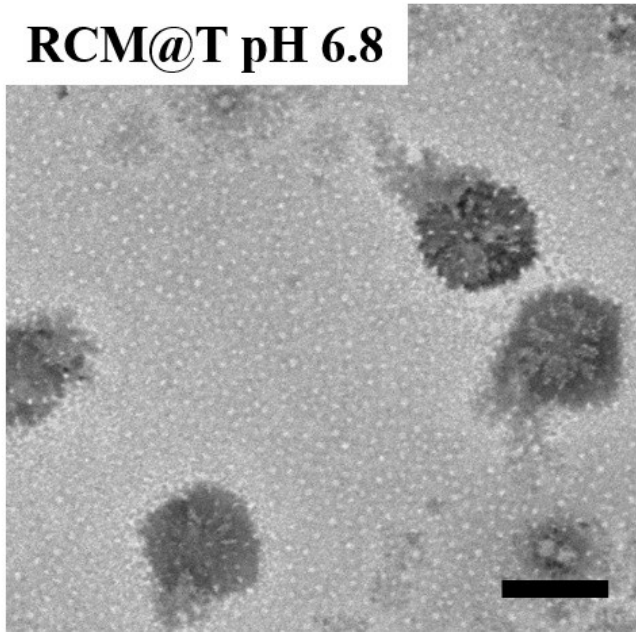

**(B)**

**RCM@T pH 6.8+GSH**

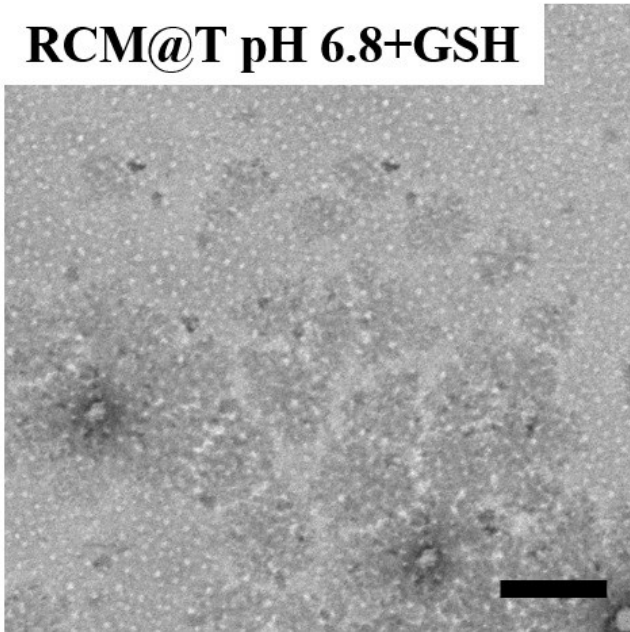

Supplement: d1bm00331c10.pdf [file d1bm00331c10.pdf]

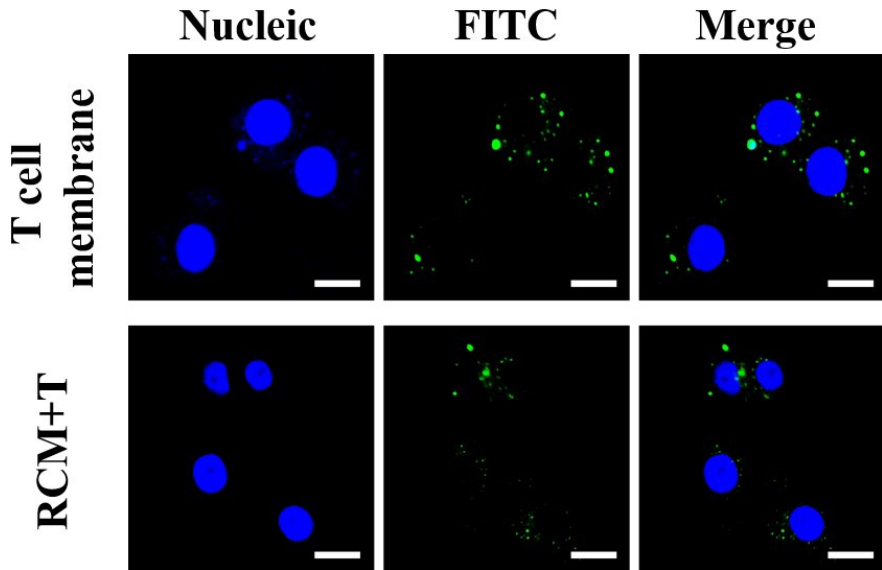

Supplement: d1bm00331c11.pdf [file d1bm00331c11.pdf]

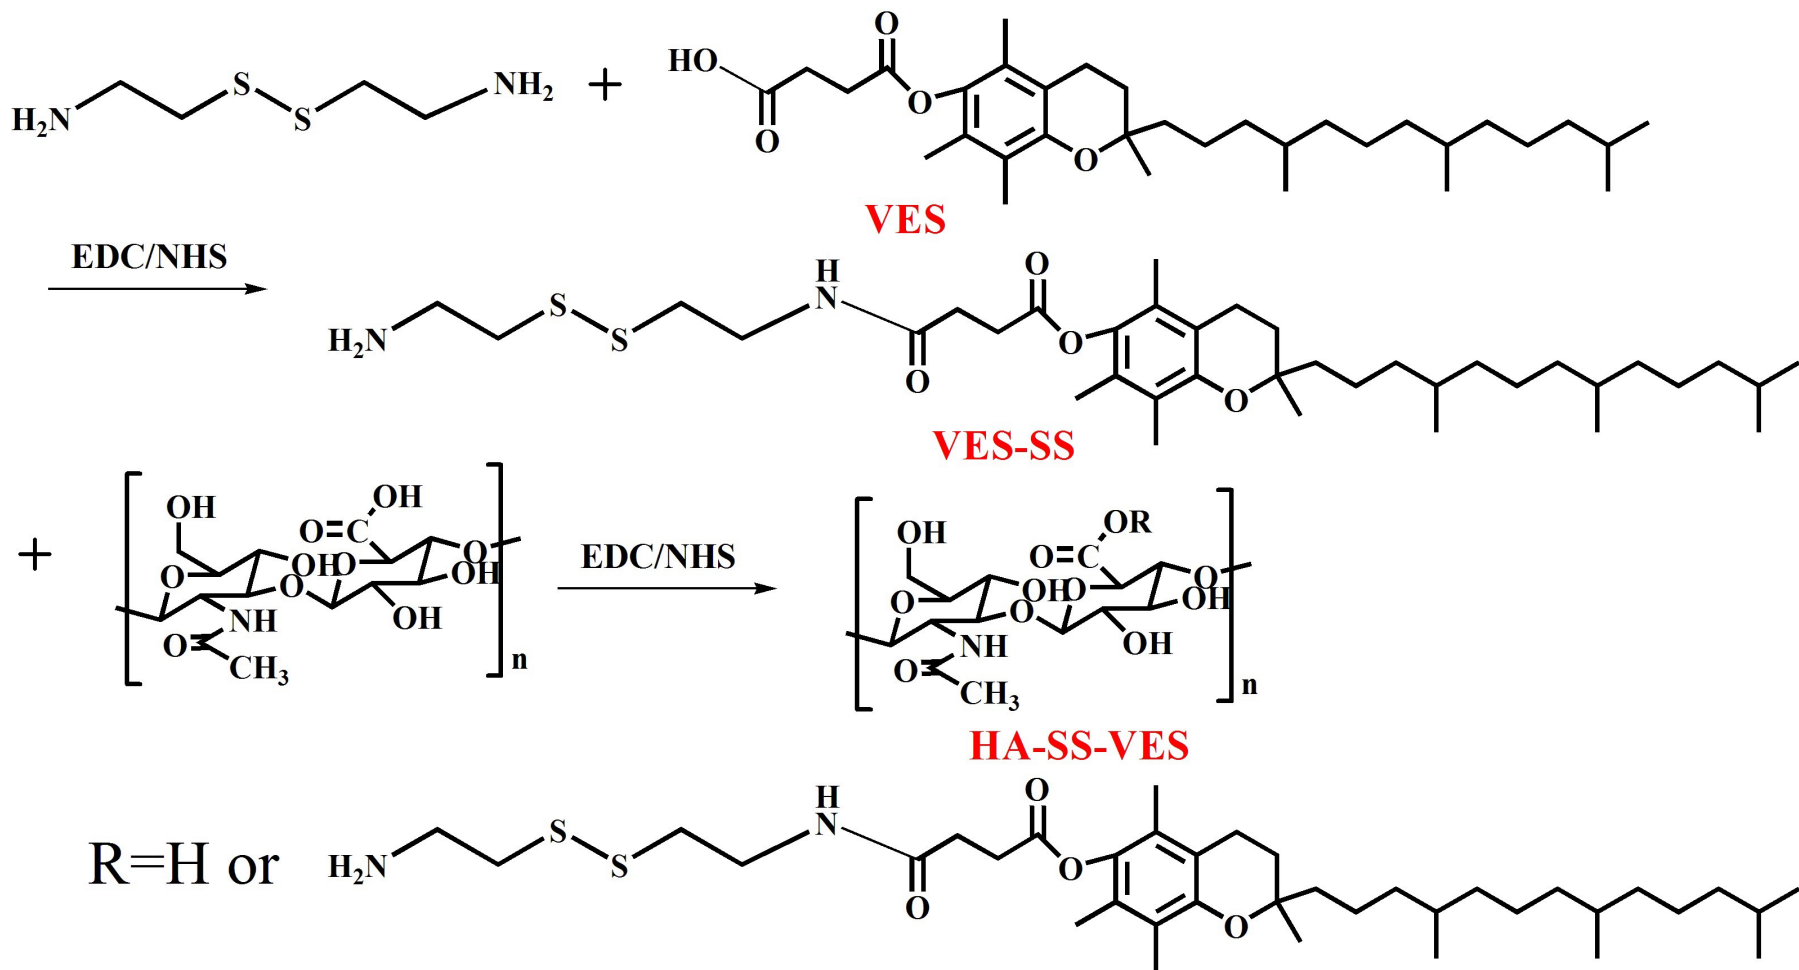

Supplement: d1bm00331c2.pdf [file d1bm00331c2.pdf]

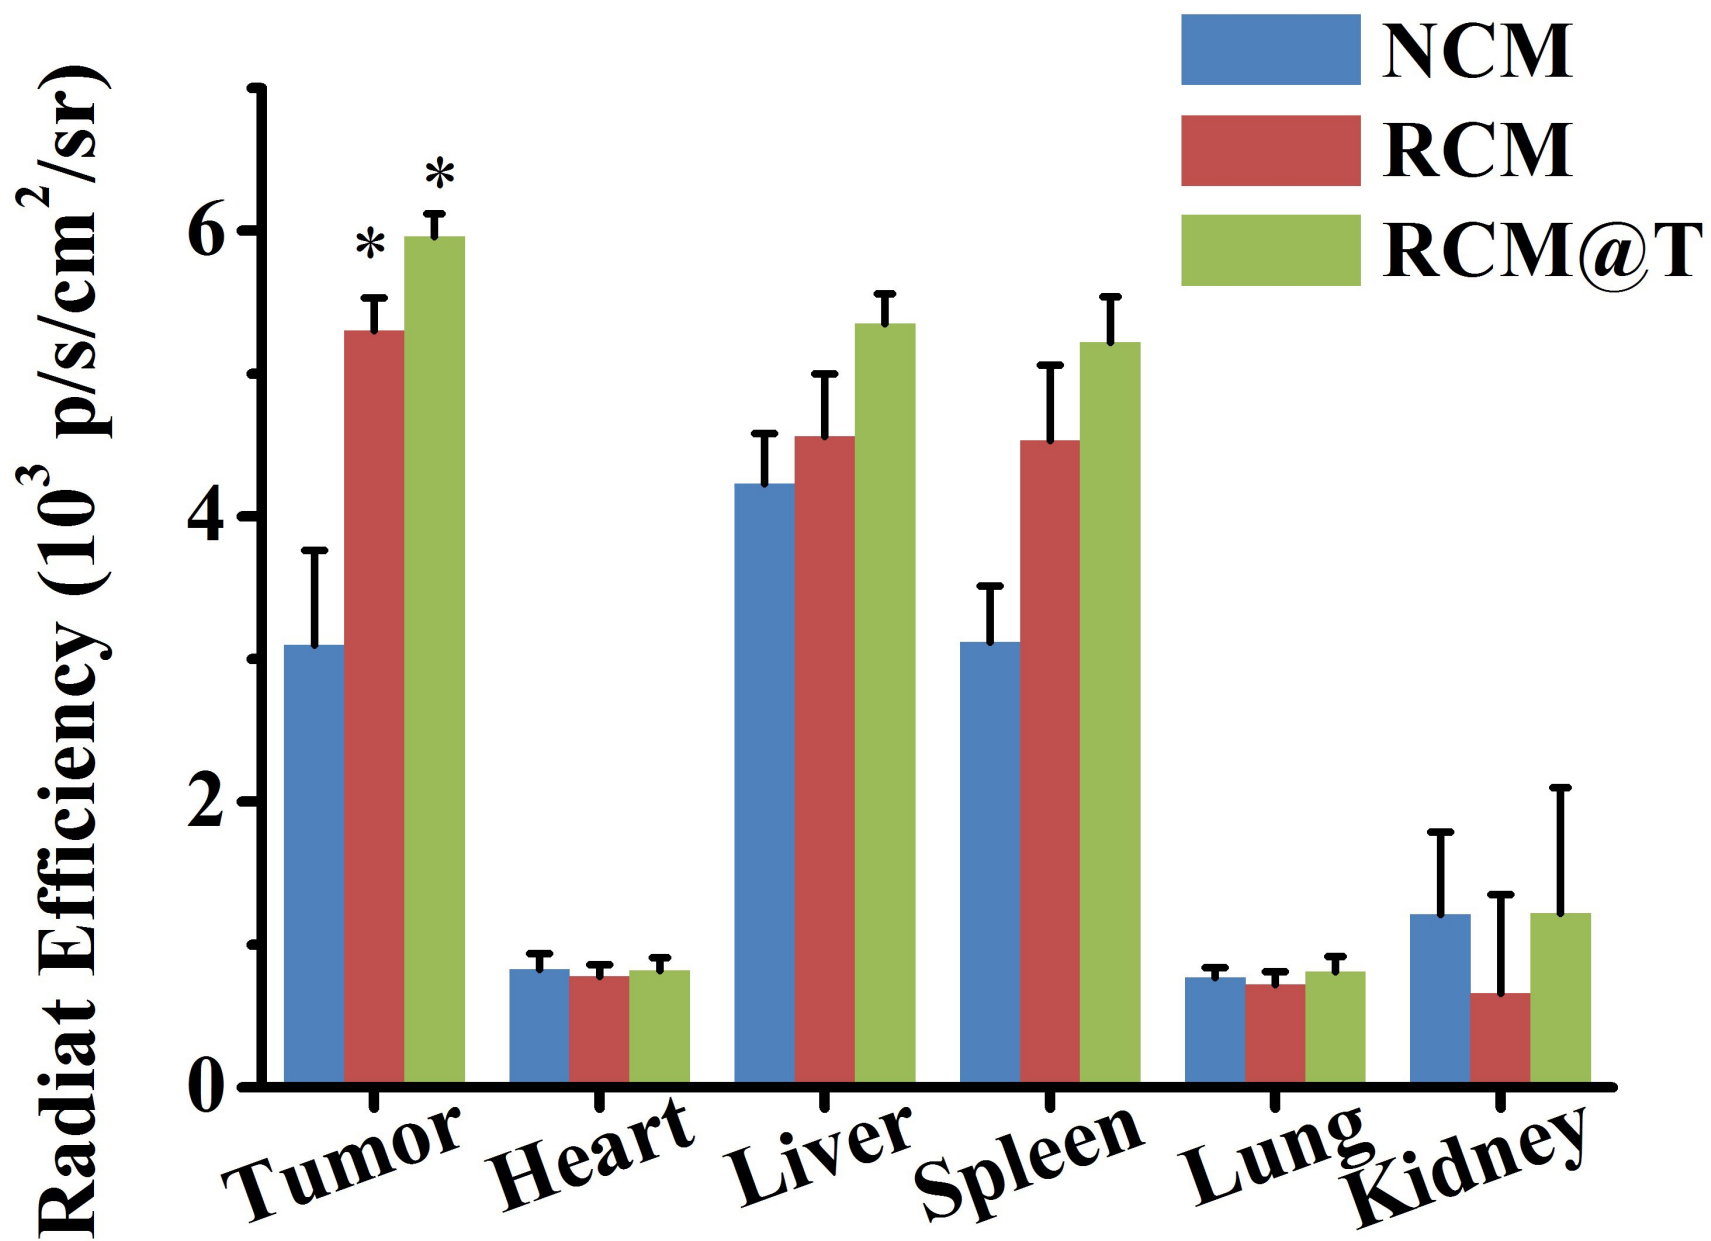

Supplement: d1bm00331c3.pdf [file d1bm00331c3.pdf]

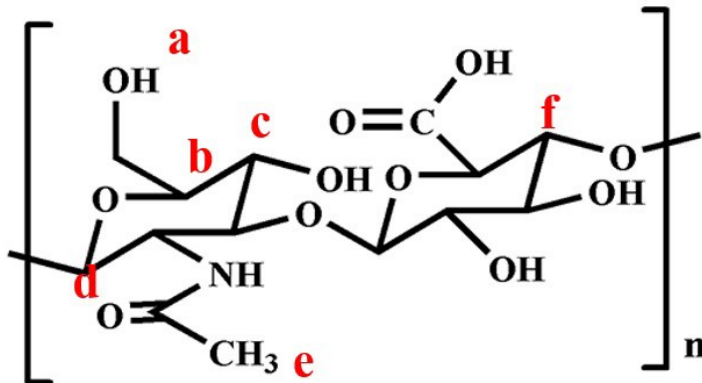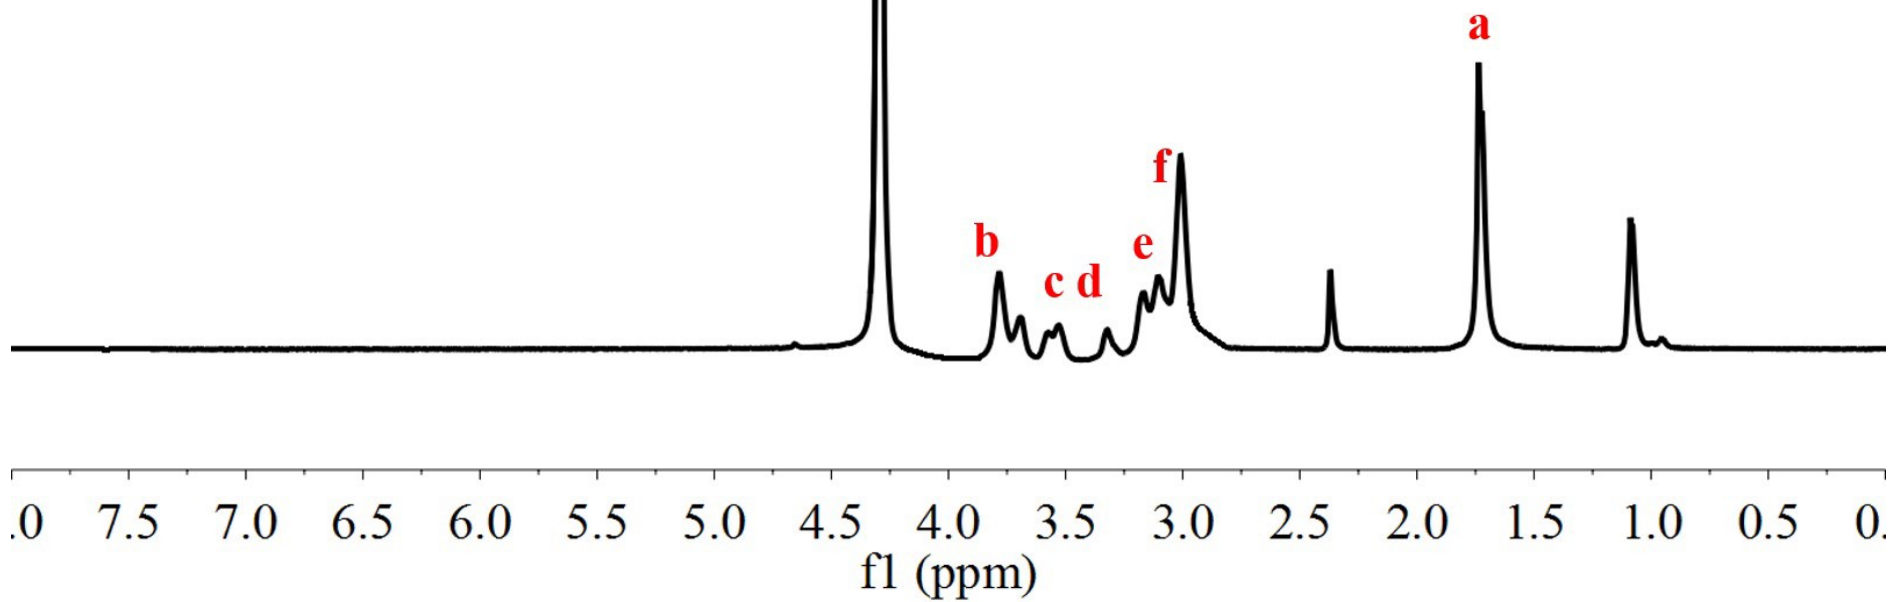

Supplement: d1bm00331c4.pdf [file d1bm00331c4.pdf]

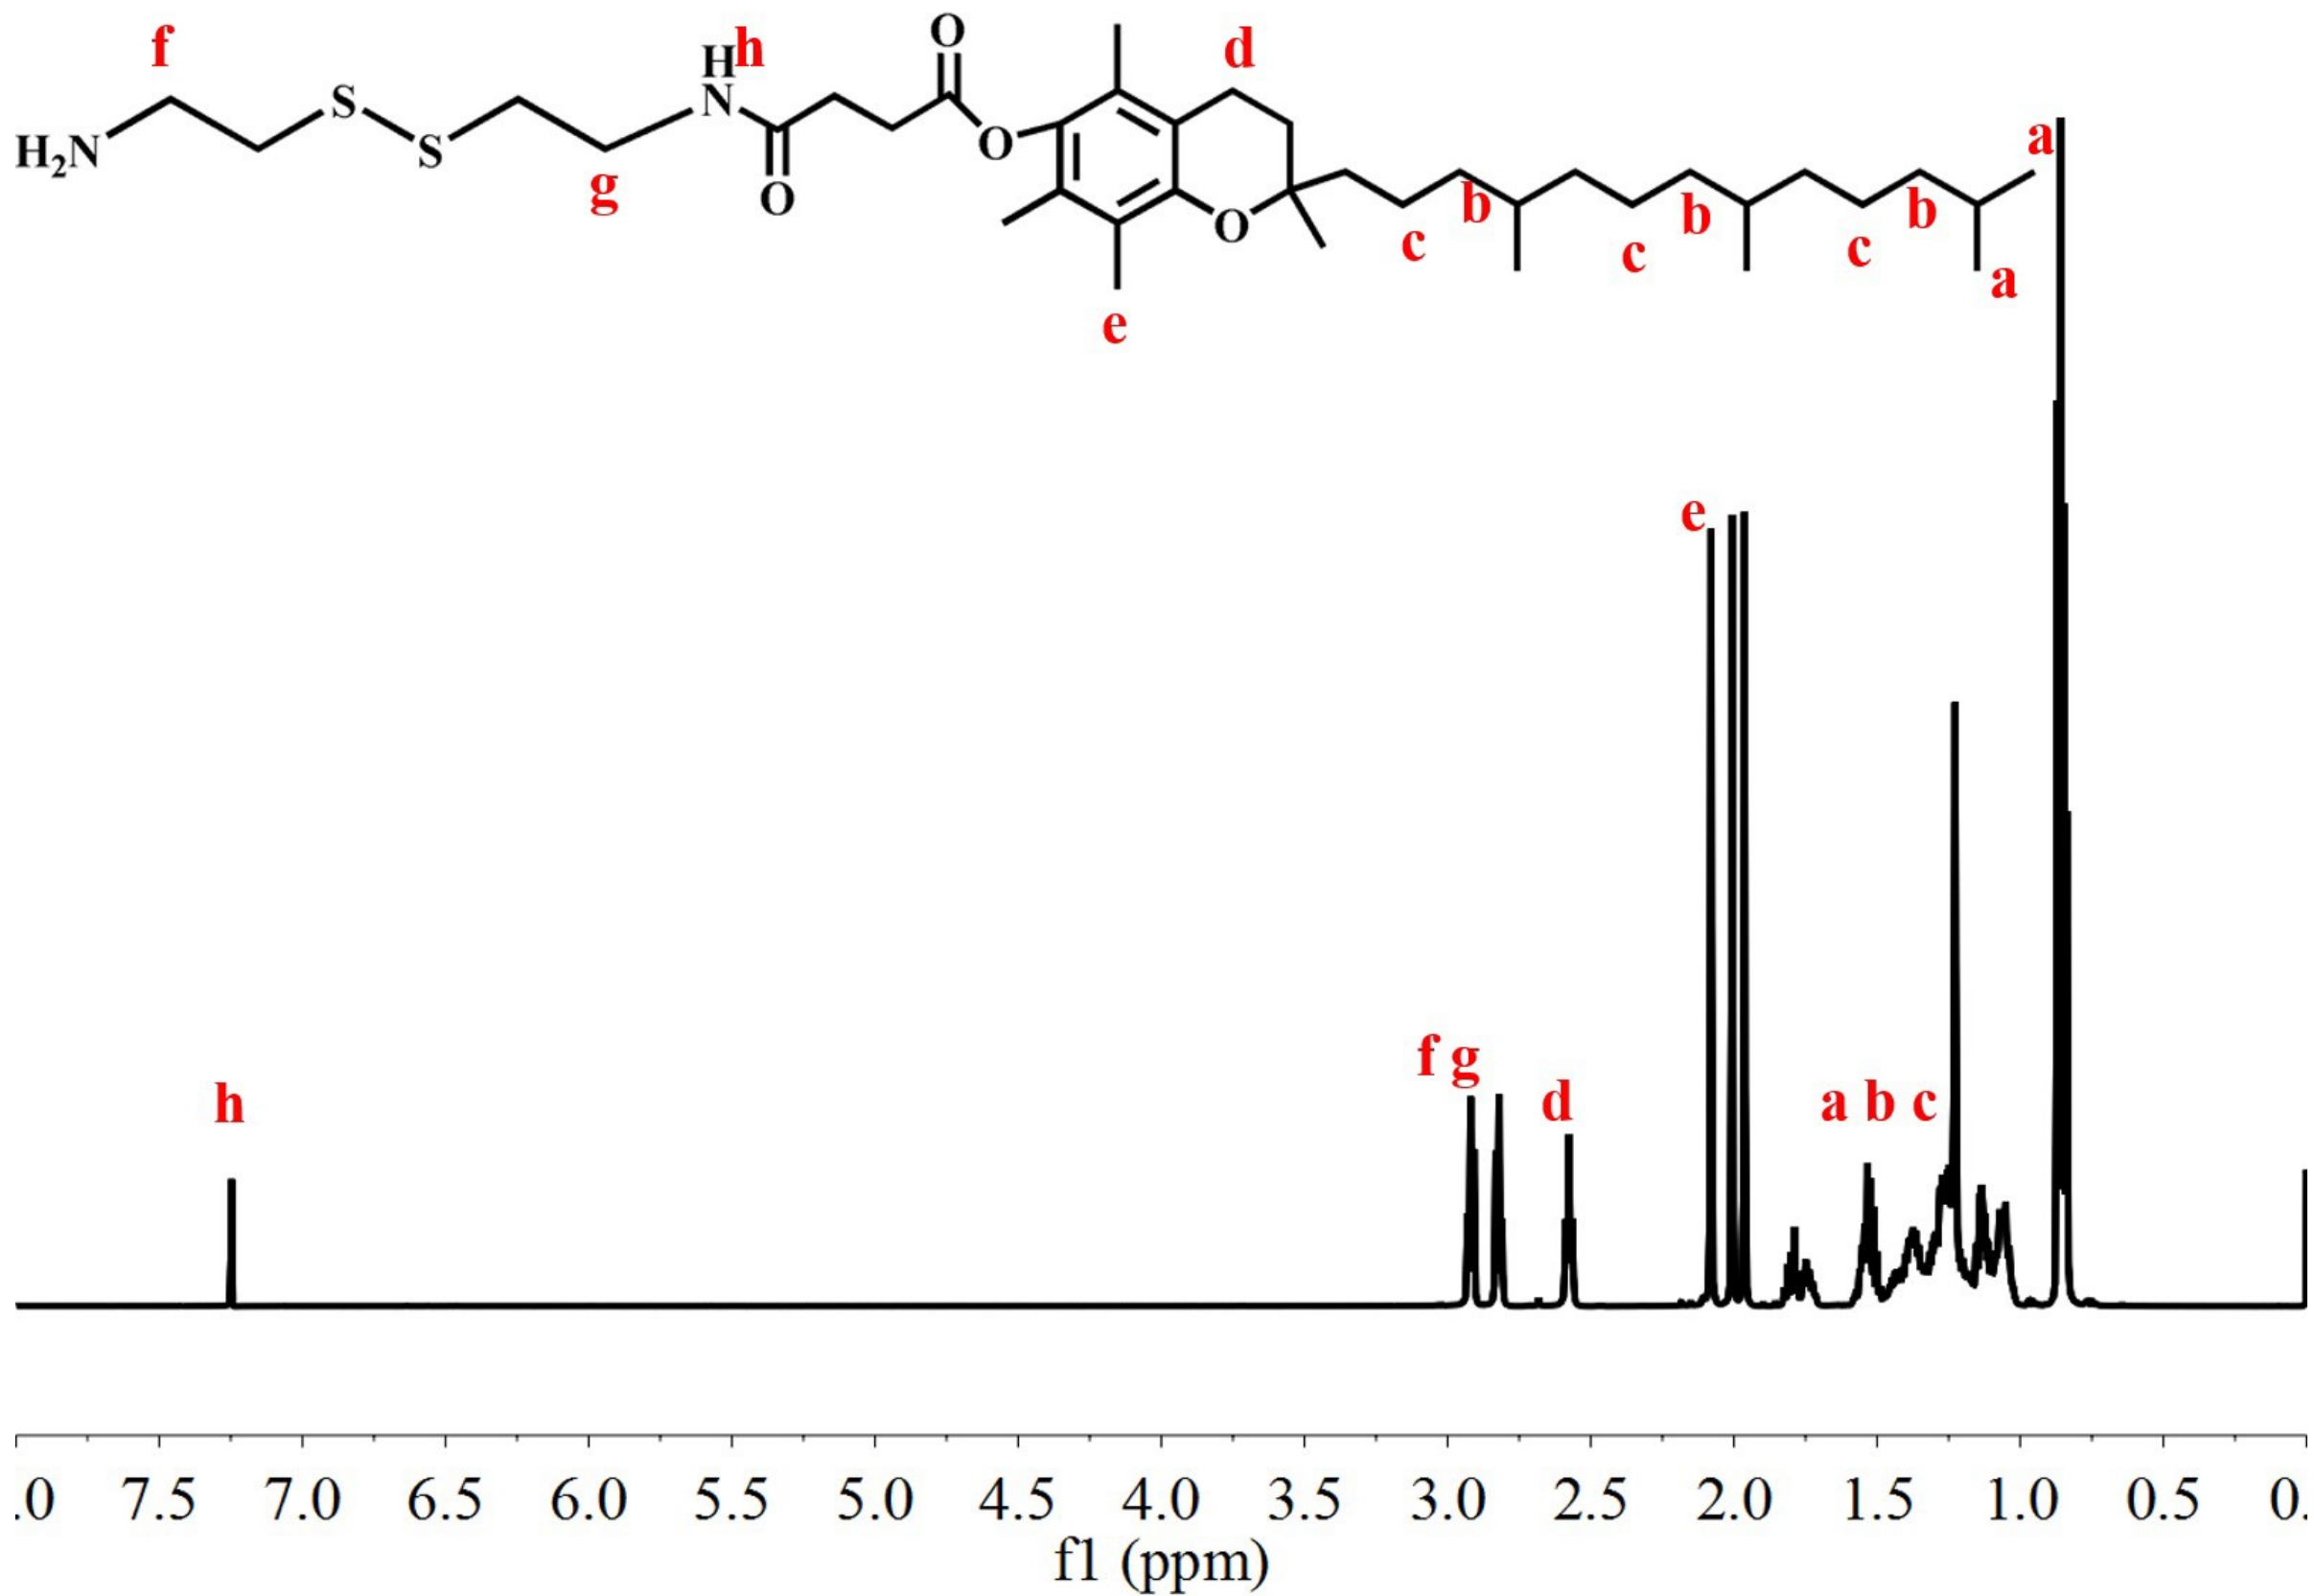

Supplement: d1bm00331c5.pdf [file d1bm00331c5.pdf]

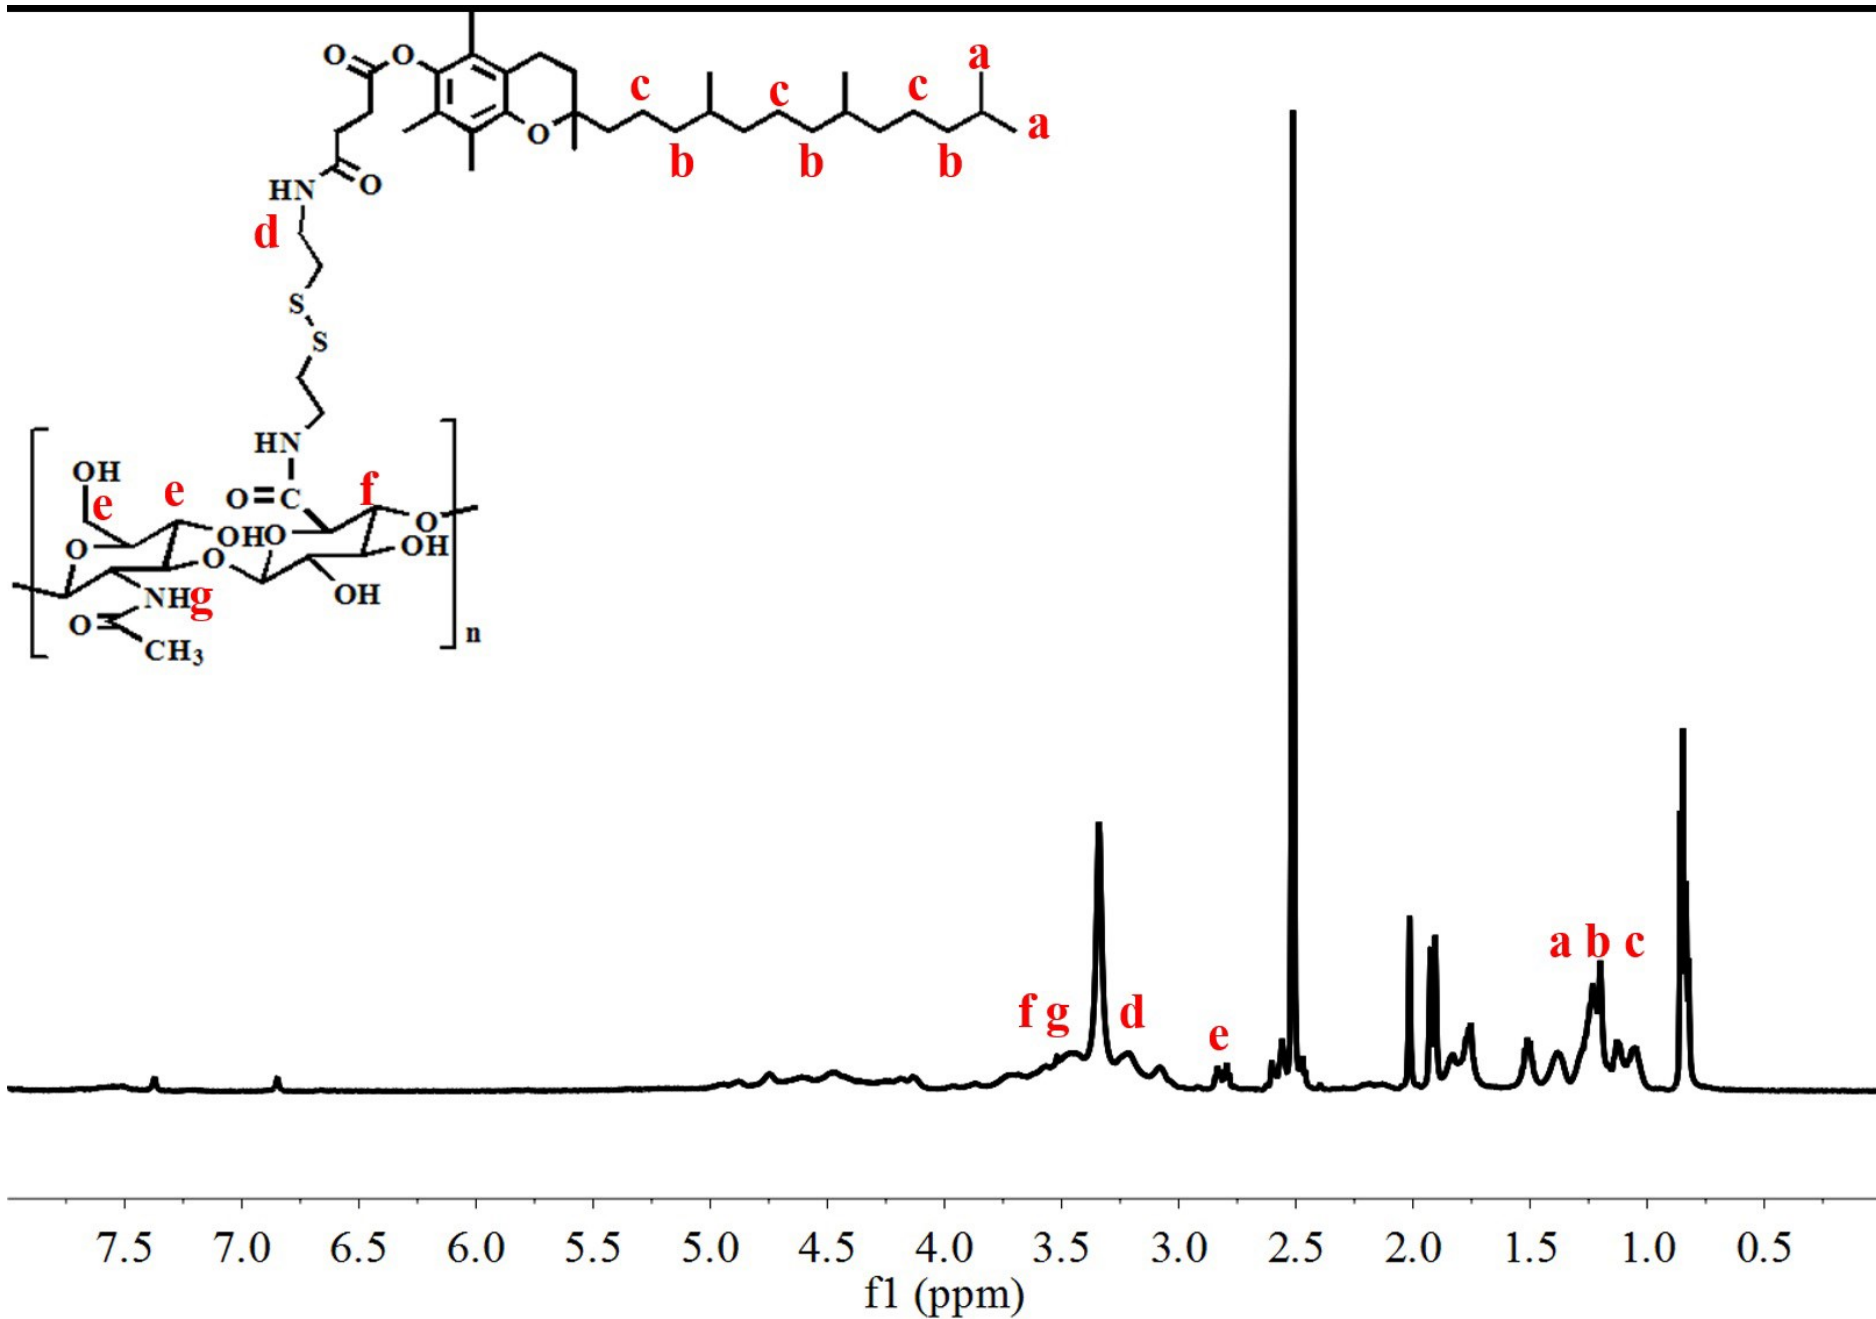

Supplement: d1bm00331c6.pdf [file d1bm00331c6.pdf]

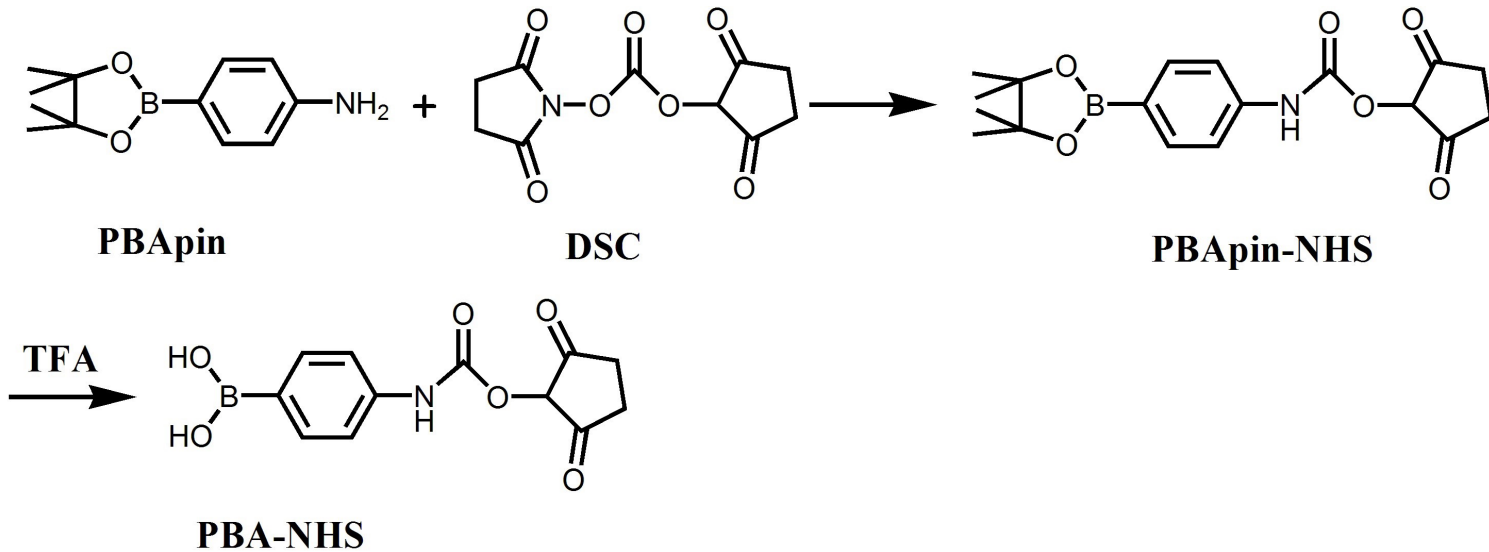

Supplement: d1bm00331c7.pdf [file d1bm00331c7.pdf]

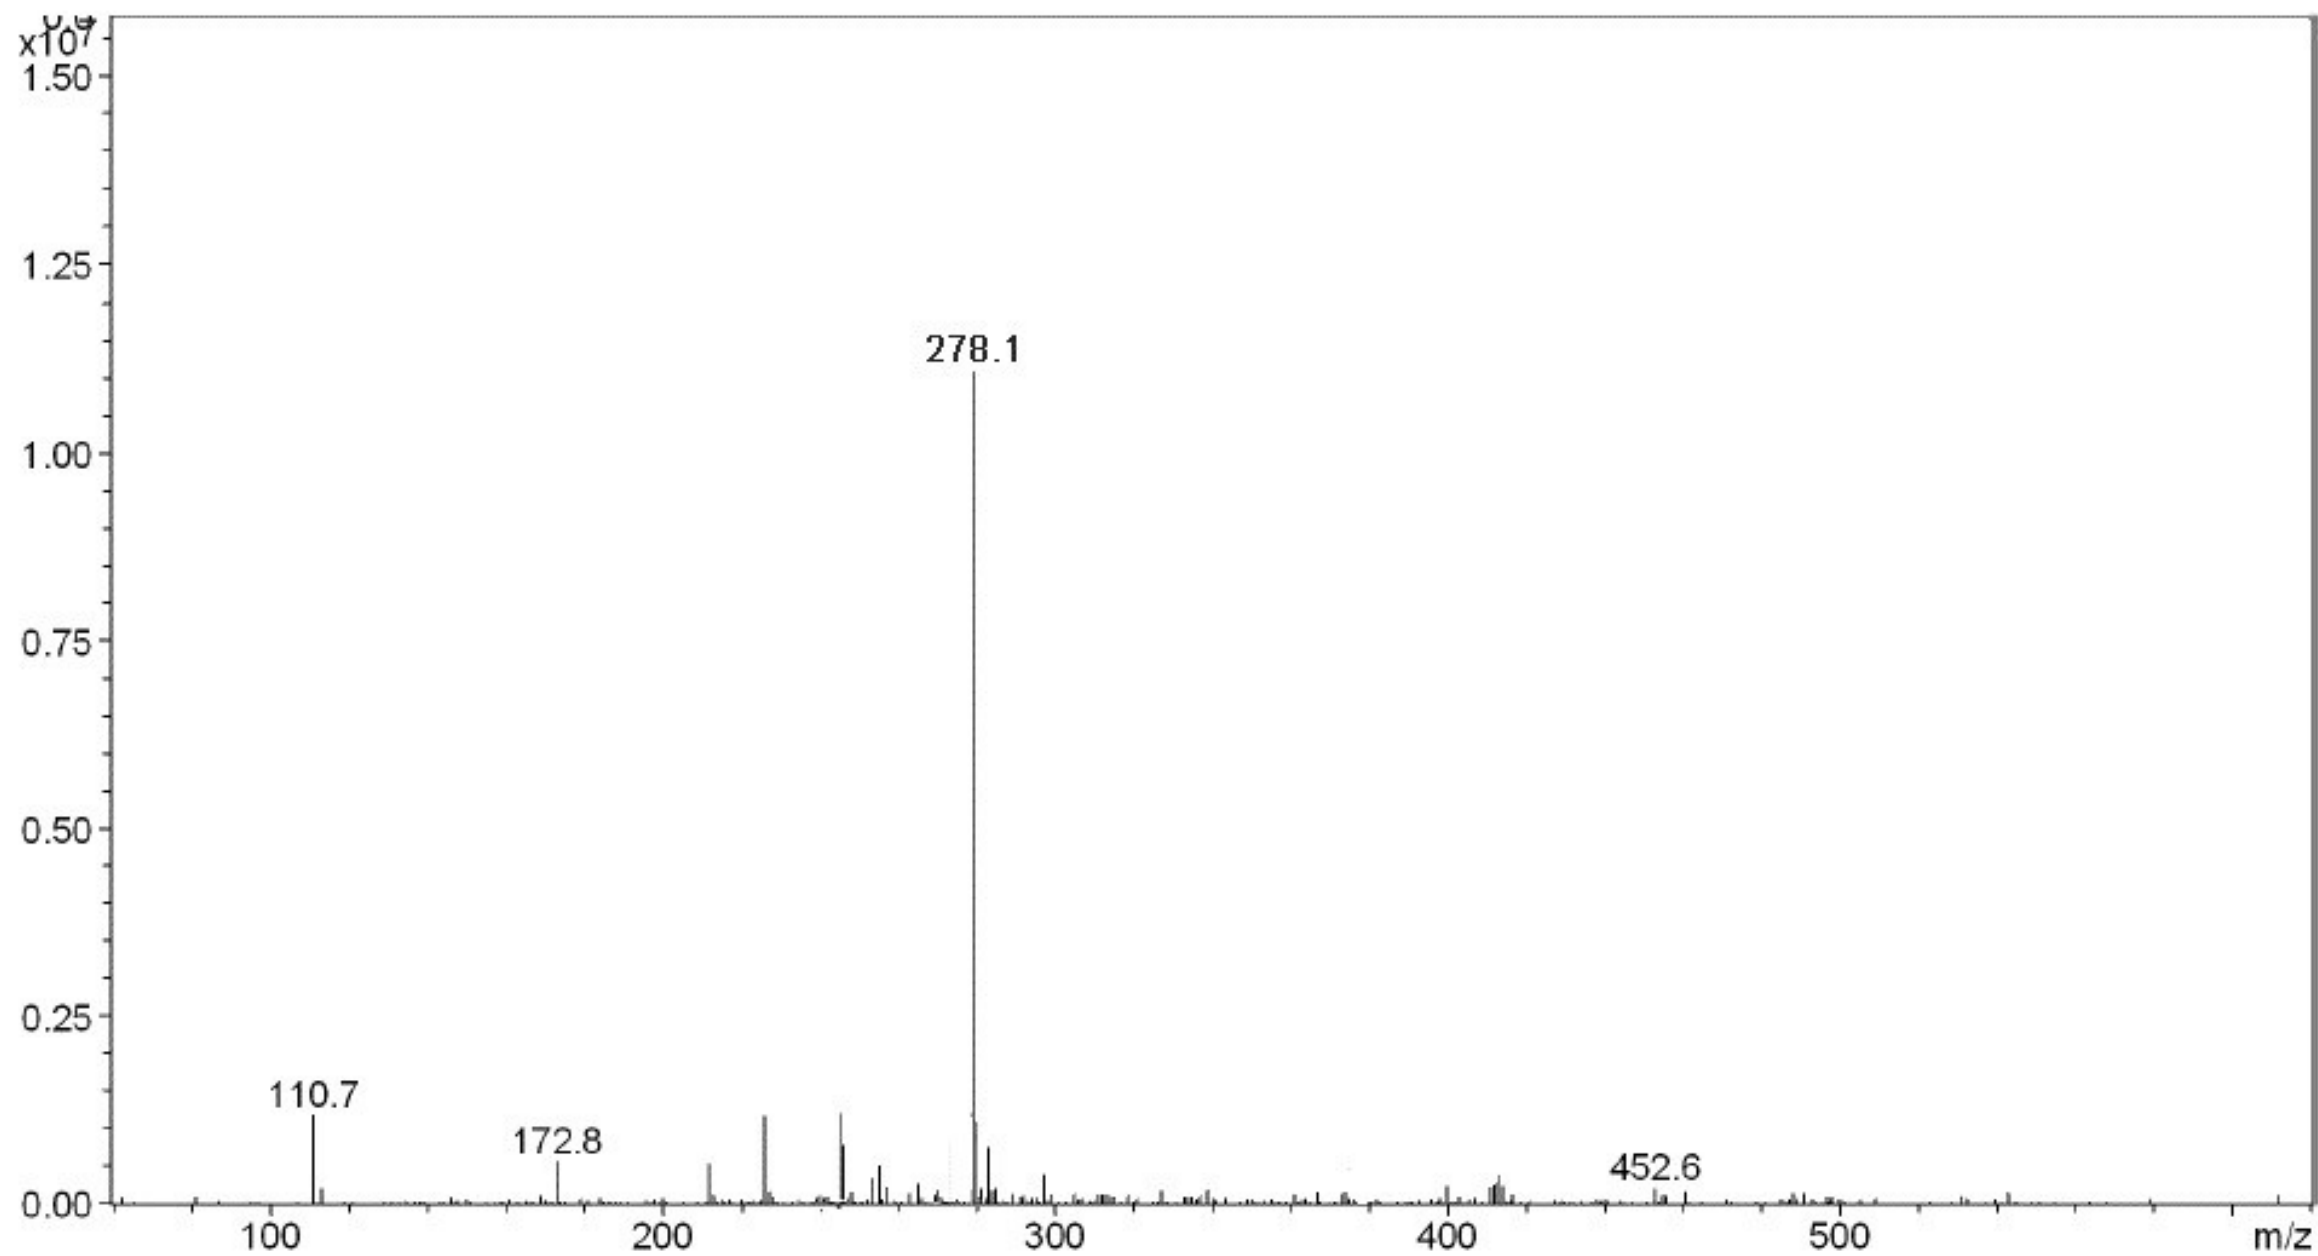

Supplement: d1bm00331c8.pdf [file d1bm00331c8.pdf]

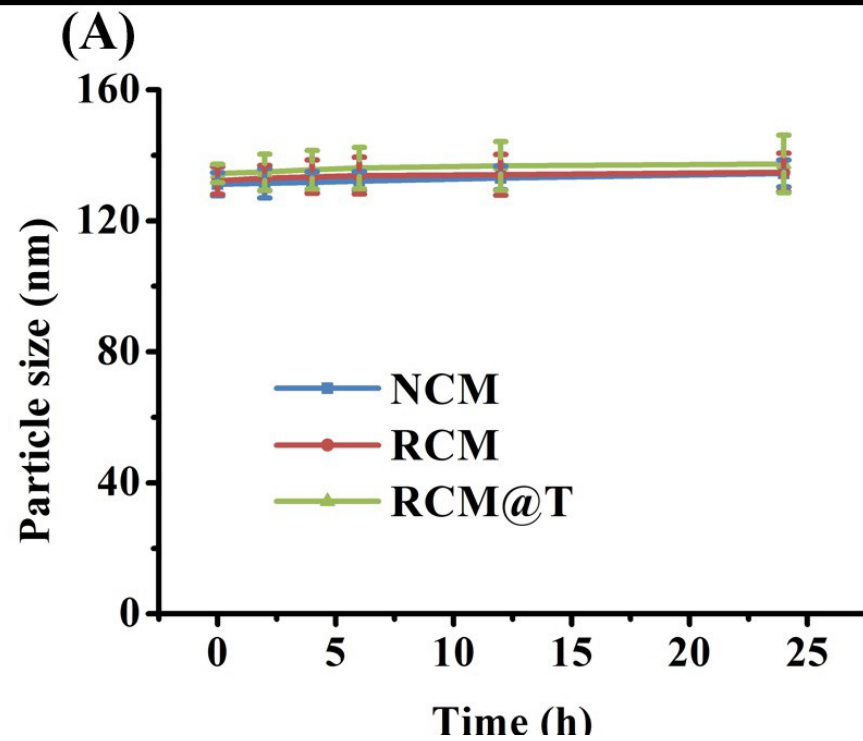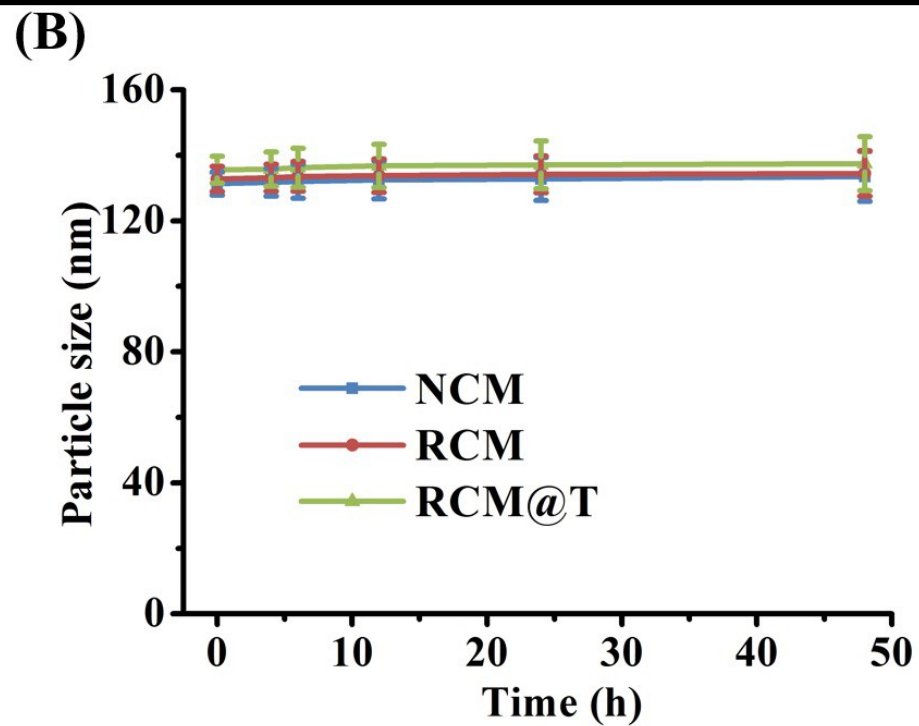

Supplement: d1bm00331c9.pdf [file d1bm00331c9.pdf]
